# Supplementary material for: Comprehensive analysis of the human ESCRT-III-MIT domain interactome reveals new cofactors for cytokinetic abscission
Source: eLife journal article supplement (doi:10.7554/elife.77779), 2022-08-10
Supplement: fig2-figsupp6-data1 [file Figure 2-figure supplement 6_uncroppedblots.pdf › Figure 2-figure supplement 6-source data 1/Figure 2-figure supplement 6_uncroppedblots.pdf]

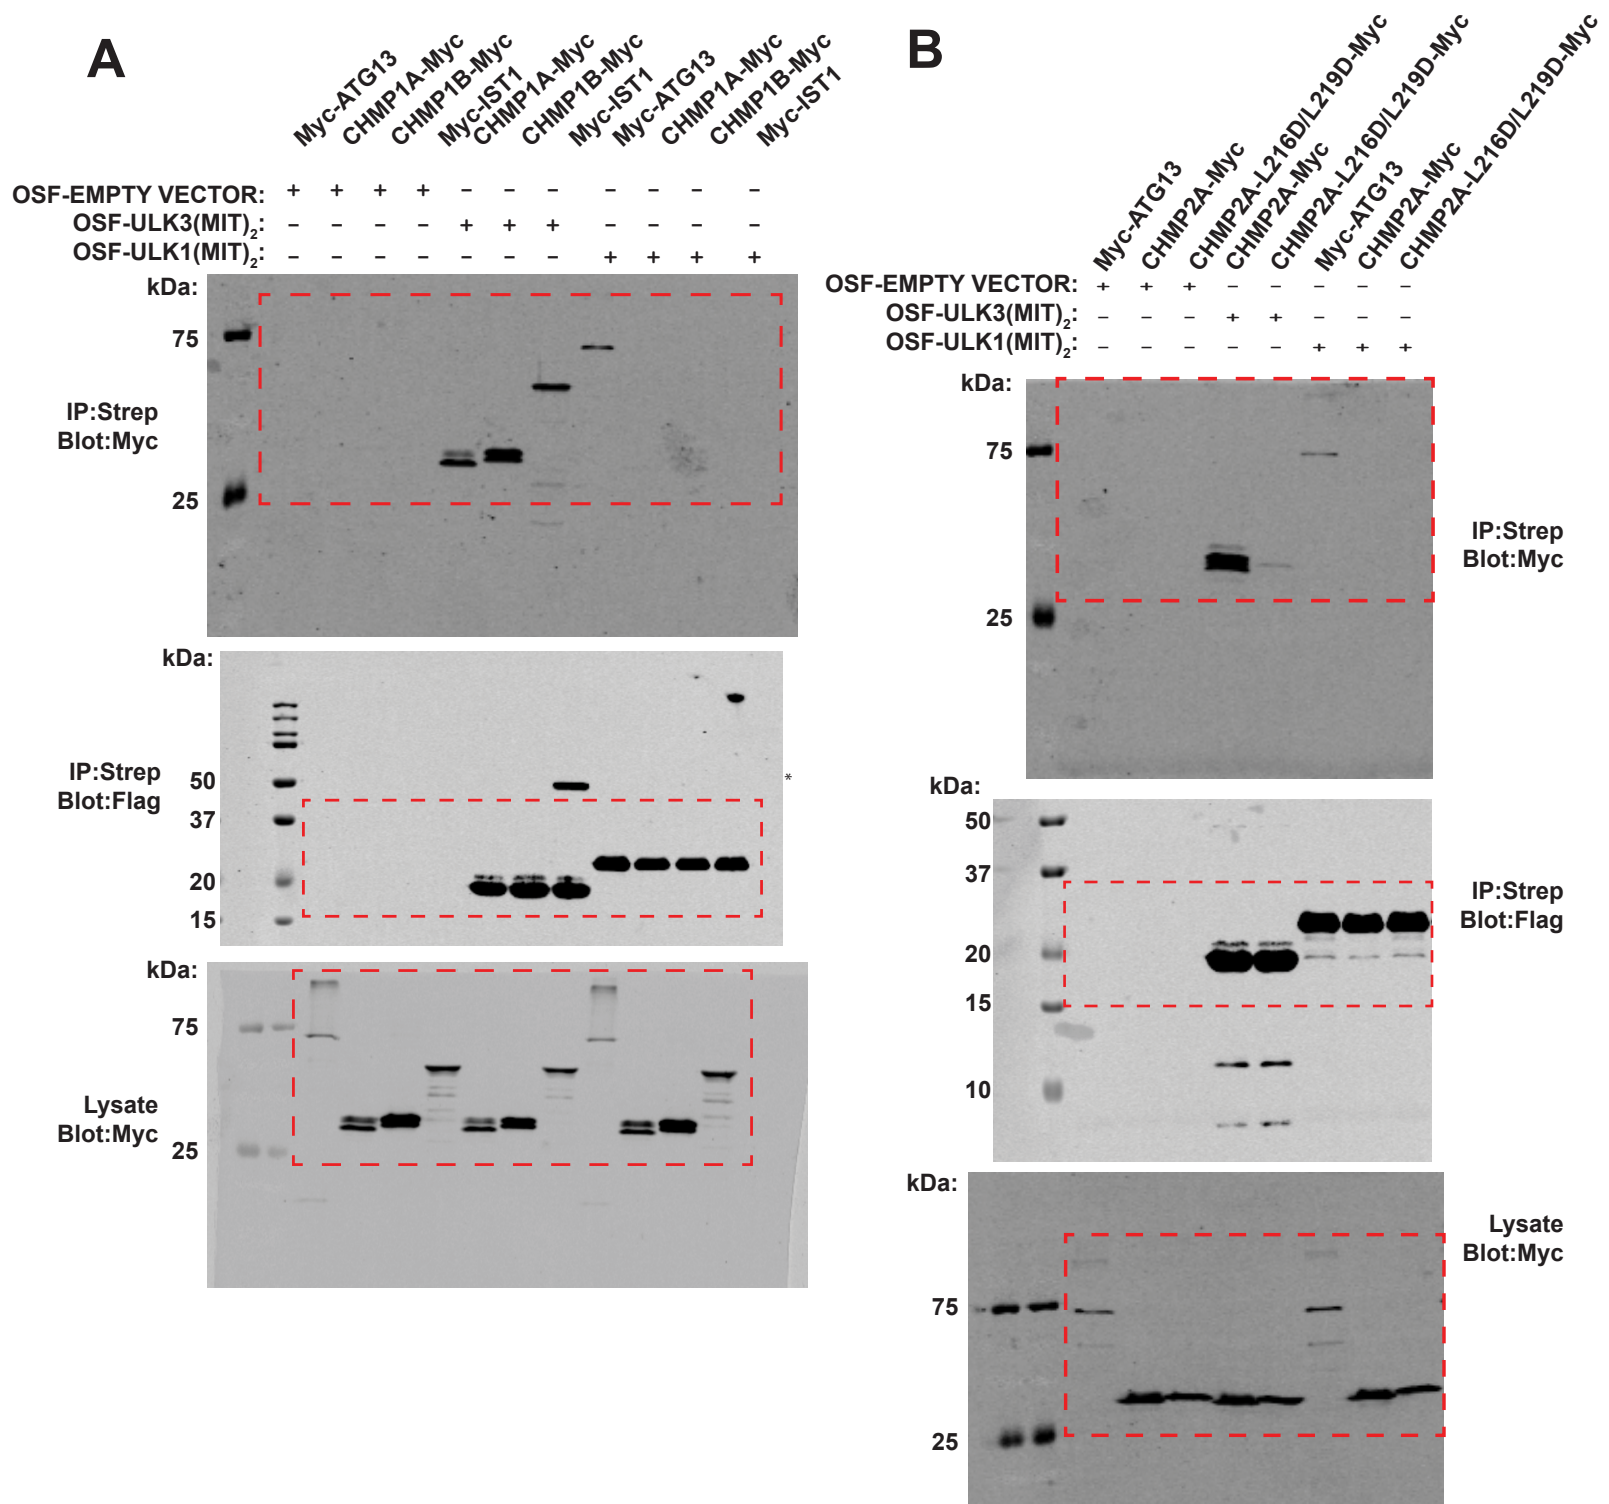

**Uncropped Western blots for Figure 2-figure supplement 6. (A)** Uncropped blots for Figure 2-figure supplement 6A. Asterisk in middle panel denotes cross-reactivity with the band corresponding to IST1 and/or its secondary antibody. **(B)** Uncropped blots for Figure 2-figure supplement 6B.
