# Supplementary material for: Comprehensive analysis of the human ESCRT-III-MIT domain interactome reveals new cofactors for cytokinetic abscission
Source: eLife journal article supplement (doi:10.7554/elife.77779), 2022-08-10
Supplement: fig5-figsupp1-data1 [file elife-77779-fig5-figsupp1-data1-v1.zip]

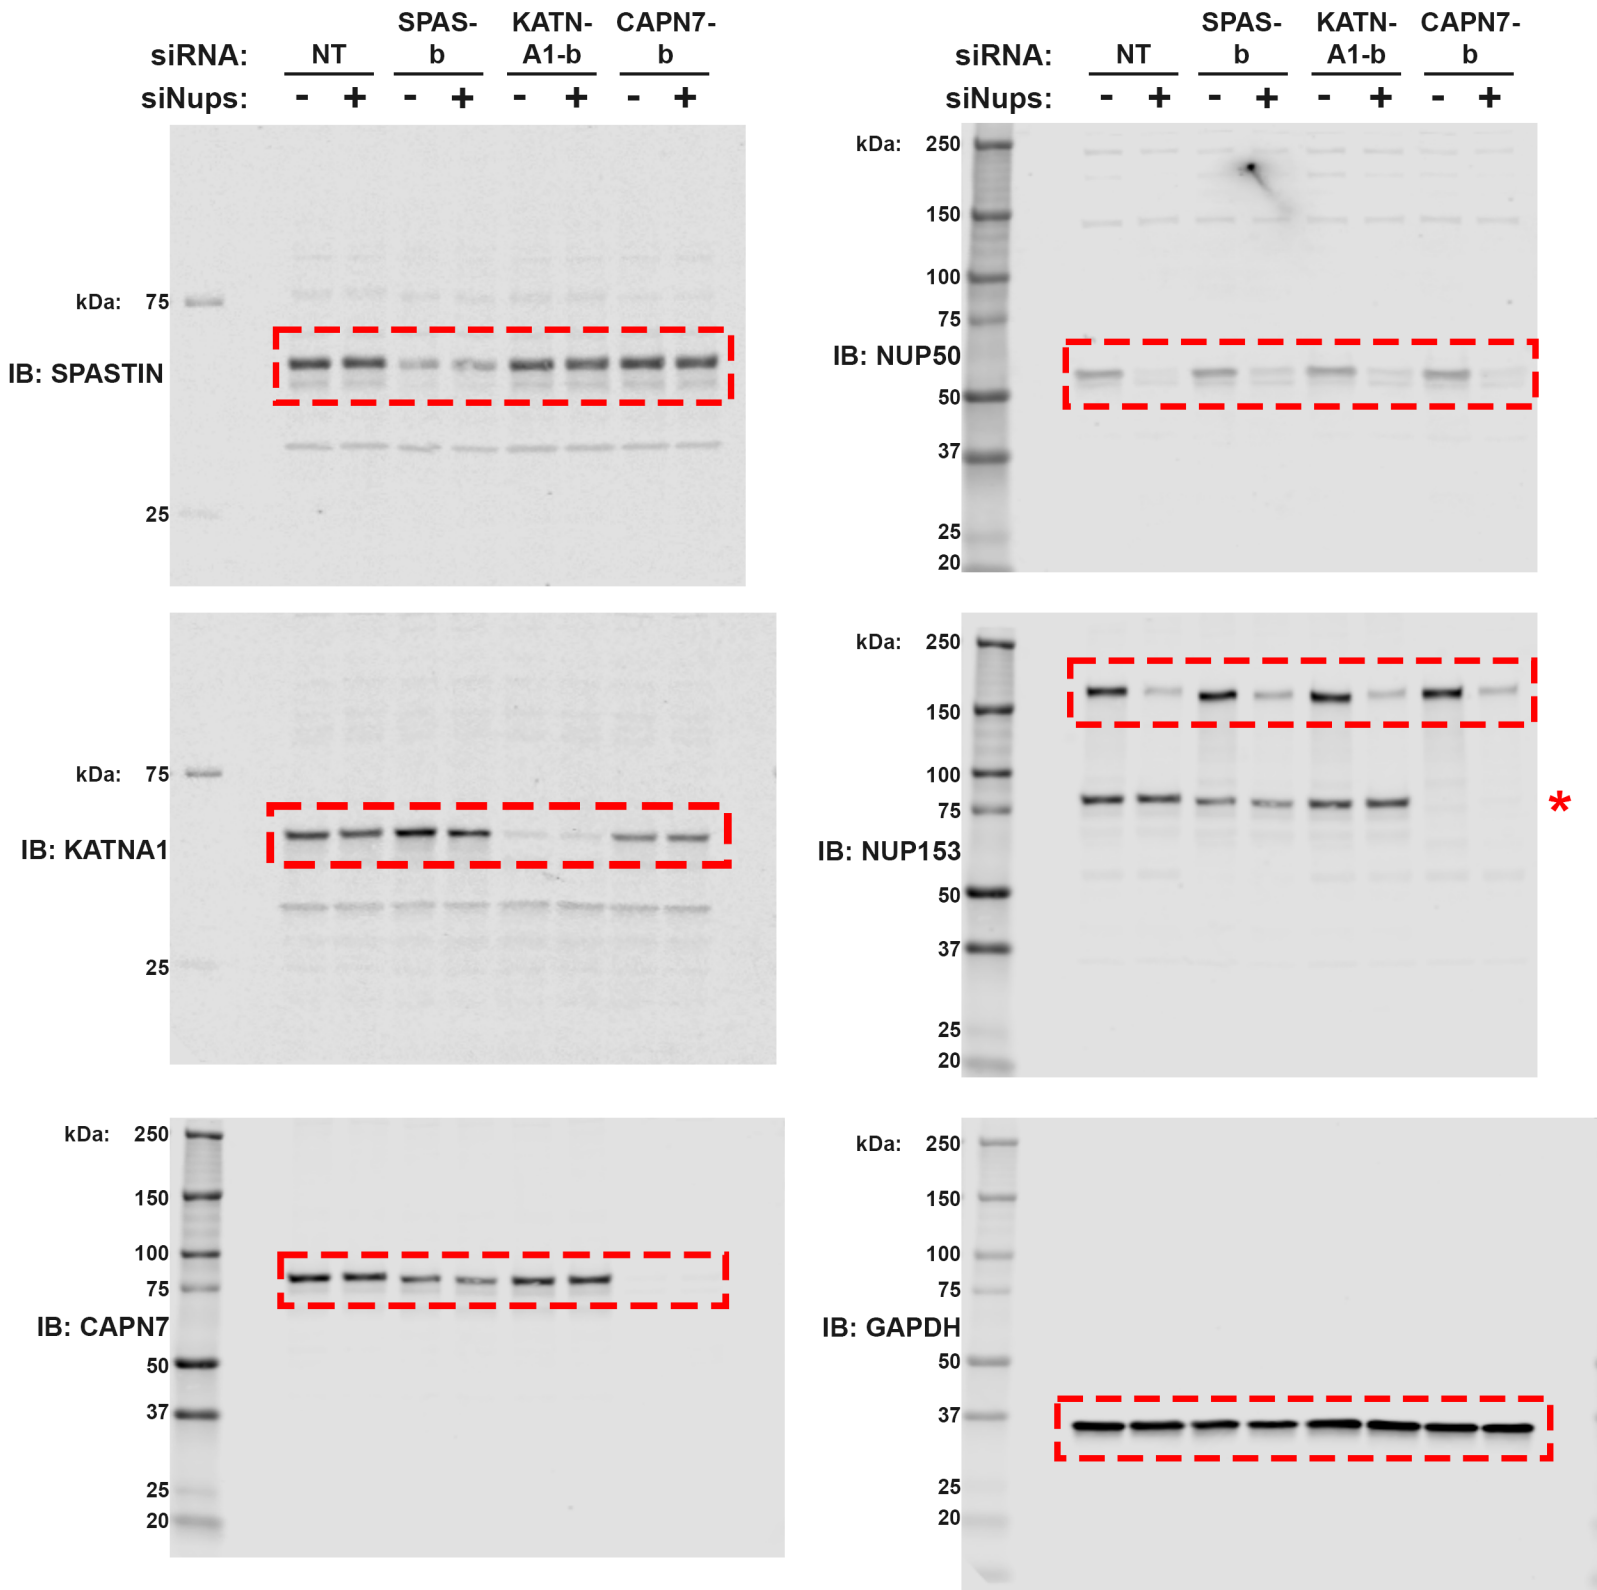

**Uncropped Western blots for Figure 5-figure supplement 1B.** The CAPN7 blot shown at the bottom left was reprobed with the NUP153 antibody (shown middle right). \* indicates the residual CAPN7 signal.
