# Supplementary material for: Comprehensive analysis of the human ESCRT-III-MIT domain interactome reveals new cofactors for cytokinetic abscission
Source: eLife journal article supplement (doi:10.7554/elife.77779), 2022-08-10
Supplement: fig6-figsupp1-data1 [file Figure 6-figure supplement 1A uncropped blots.pdf › Figure 6-figure supplement 1 source data 1/Figure 6-figure supplement 1A uncropped blots.pdf]

| Cell Line: | mCherry |   |   | mCh-SPASTIN |   |       |   |       |   |
|------------|---------|---|---|-------------|---|-------|---|-------|---|
|            |         |   |   | WT          |   | F124D |   | L177D |   |
| siNT:      | +       | + | - | +           | - | +     | - | +     | - |
| siSPAS:    | -       | - | + | -           | + | -     | + | -     | + |
| siNups:    | -       | + | + | +           | + | +     | + | +     | + |

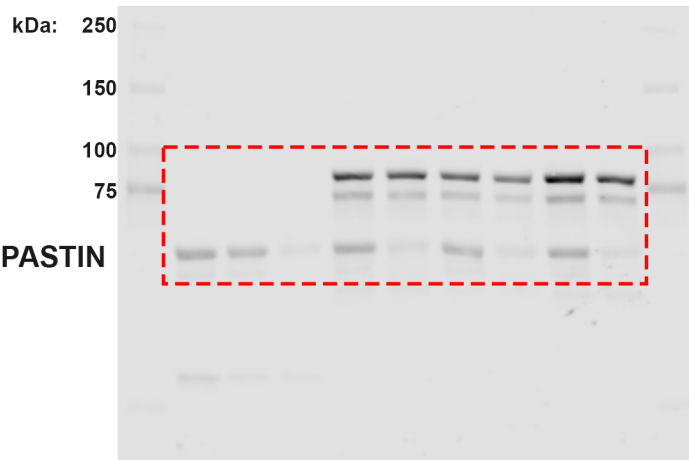

| Cell Line: | mCherry |   |   | mCh-SPASTIN |   |       |   |       |   |
|------------|---------|---|---|-------------|---|-------|---|-------|---|
|            |         |   |   | WT          |   | F124D |   | L177D |   |
| siNT:      | +       | + | - | +           | - | +     | - | +     | - |
| siSPAS:    | -       | - | + | -           | + | -     | + | -     | + |
| siNups:    | -       | + | + | +           | + | +     | + | +     | + |

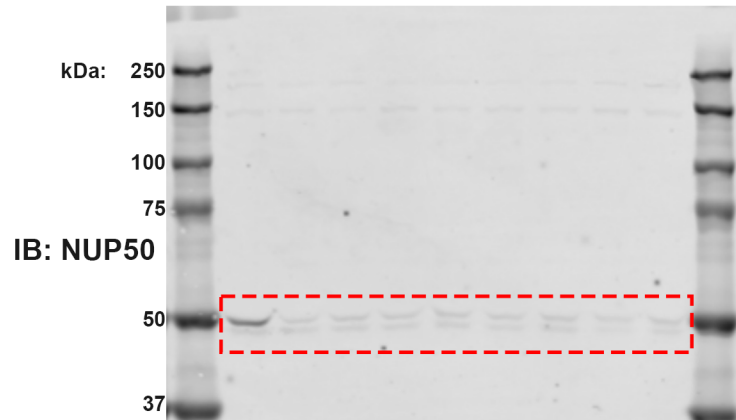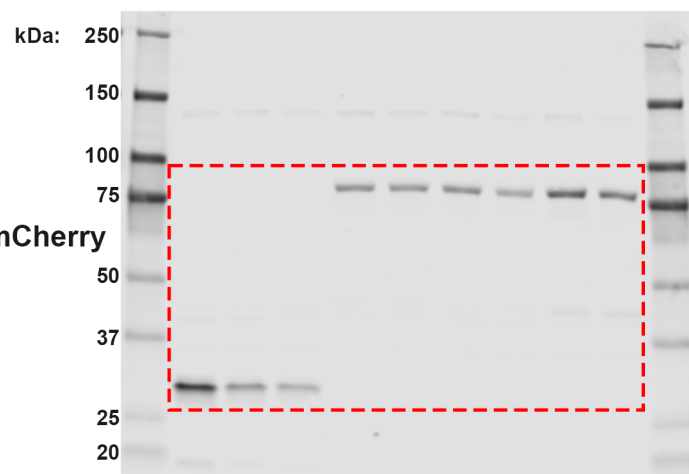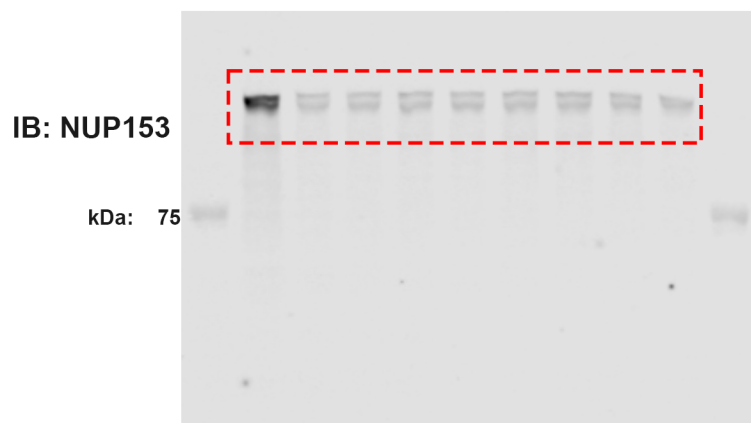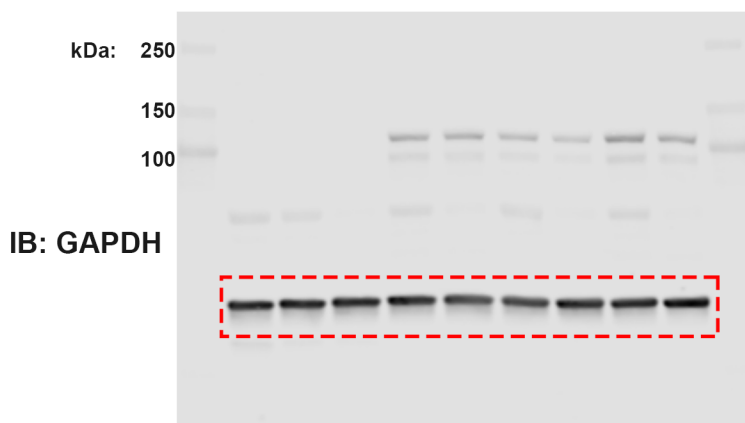

Uncropped Western blots for Figure 6 -figure supplement 1A.
