# Supplementary material for: Comprehensive analysis of the human ESCRT-III-MIT domain interactome reveals new cofactors for cytokinetic abscission
Source: eLife. 2022 Sep 15;11:e77779. doi: 10.7554/eLife.77779 (PMC9477494; doi:10.7554/eLife.77779)
Supplement: Figure 5—figure supplement 1—source data 1. [file elife-77779-fig5-figsupp1-data1.zip]

Archive with 16 entries (16 files):
- Figure 5-figure supplement 1-source data 1/Figure5_figuresupplement1A_uncroppedblots.pdf
- Figure 5-figure supplement 1-source data 1/Figure5_figuresupplement1B_uncroppedblots.pdf
- Figure 5-figure supplement 1-source data 1/Figure 5-figure supplement 1A-RawImages/CAPN7-KATNA1-high exposure.tif
- Figure 5-figure supplement 1-source data 1/Figure 5-figure supplement 1A-RawImages/CAPN7-KATNA1-Low Exposure.tif
- Figure 5-figure supplement 1-source data 1/Figure 5-figure supplement 1A-RawImages/CHMP4C.tif
- Figure 5-figure supplement 1-source data 1/Figure 5-figure supplement 1A-RawImages/GAPDH.tif
- Figure 5-figure supplement 1-source data 1/Figure 5-figure supplement 1A-RawImages/IST1.tif
- Figure 5-figure supplement 1-source data 1/Figure 5-figure supplement 1A-RawImages/NUP153.tif
- Figure 5-figure supplement 1-source data 1/Figure 5-figure supplement 1A-RawImages/NUP50.tif
- Figure 5-figure supplement 1-source data 1/Figure 5-figure supplement 1A-RawImages/SPASTIN.tif
- Figure 5-figure supplement 1-source data 1/Figure 5-figure supplement 1B-RawImages/CAPN7.tif
- Figure 5-figure supplement 1-source data 1/Figure 5-figure supplement 1B-RawImages/GAPDH.tif
- Figure 5-figure supplement 1-source data 1/Figure 5-figure supplement 1B-RawImages/KATNA1.tif
- Figure 5-figure supplement 1-source data 1/Figure 5-figure supplement 1B-RawImages/Nup153-CAPN7.tif
- Figure 5-figure supplement 1-source data 1/Figure 5-figure supplement 1B-RawImages/NUP50.tif
- Figure 5-figure supplement 1-source data 1/Figure 5-figure supplement 1B-RawImages/SPASTIN.tif
