# Supplementary figures and images for: Comprehensive analysis of the human ESCRT-III-MIT domain interactome reveals new cofactors for cytokinetic abscission
Source: eLife journal article supplement (doi:10.7554/elife.77779), 2022-08-10

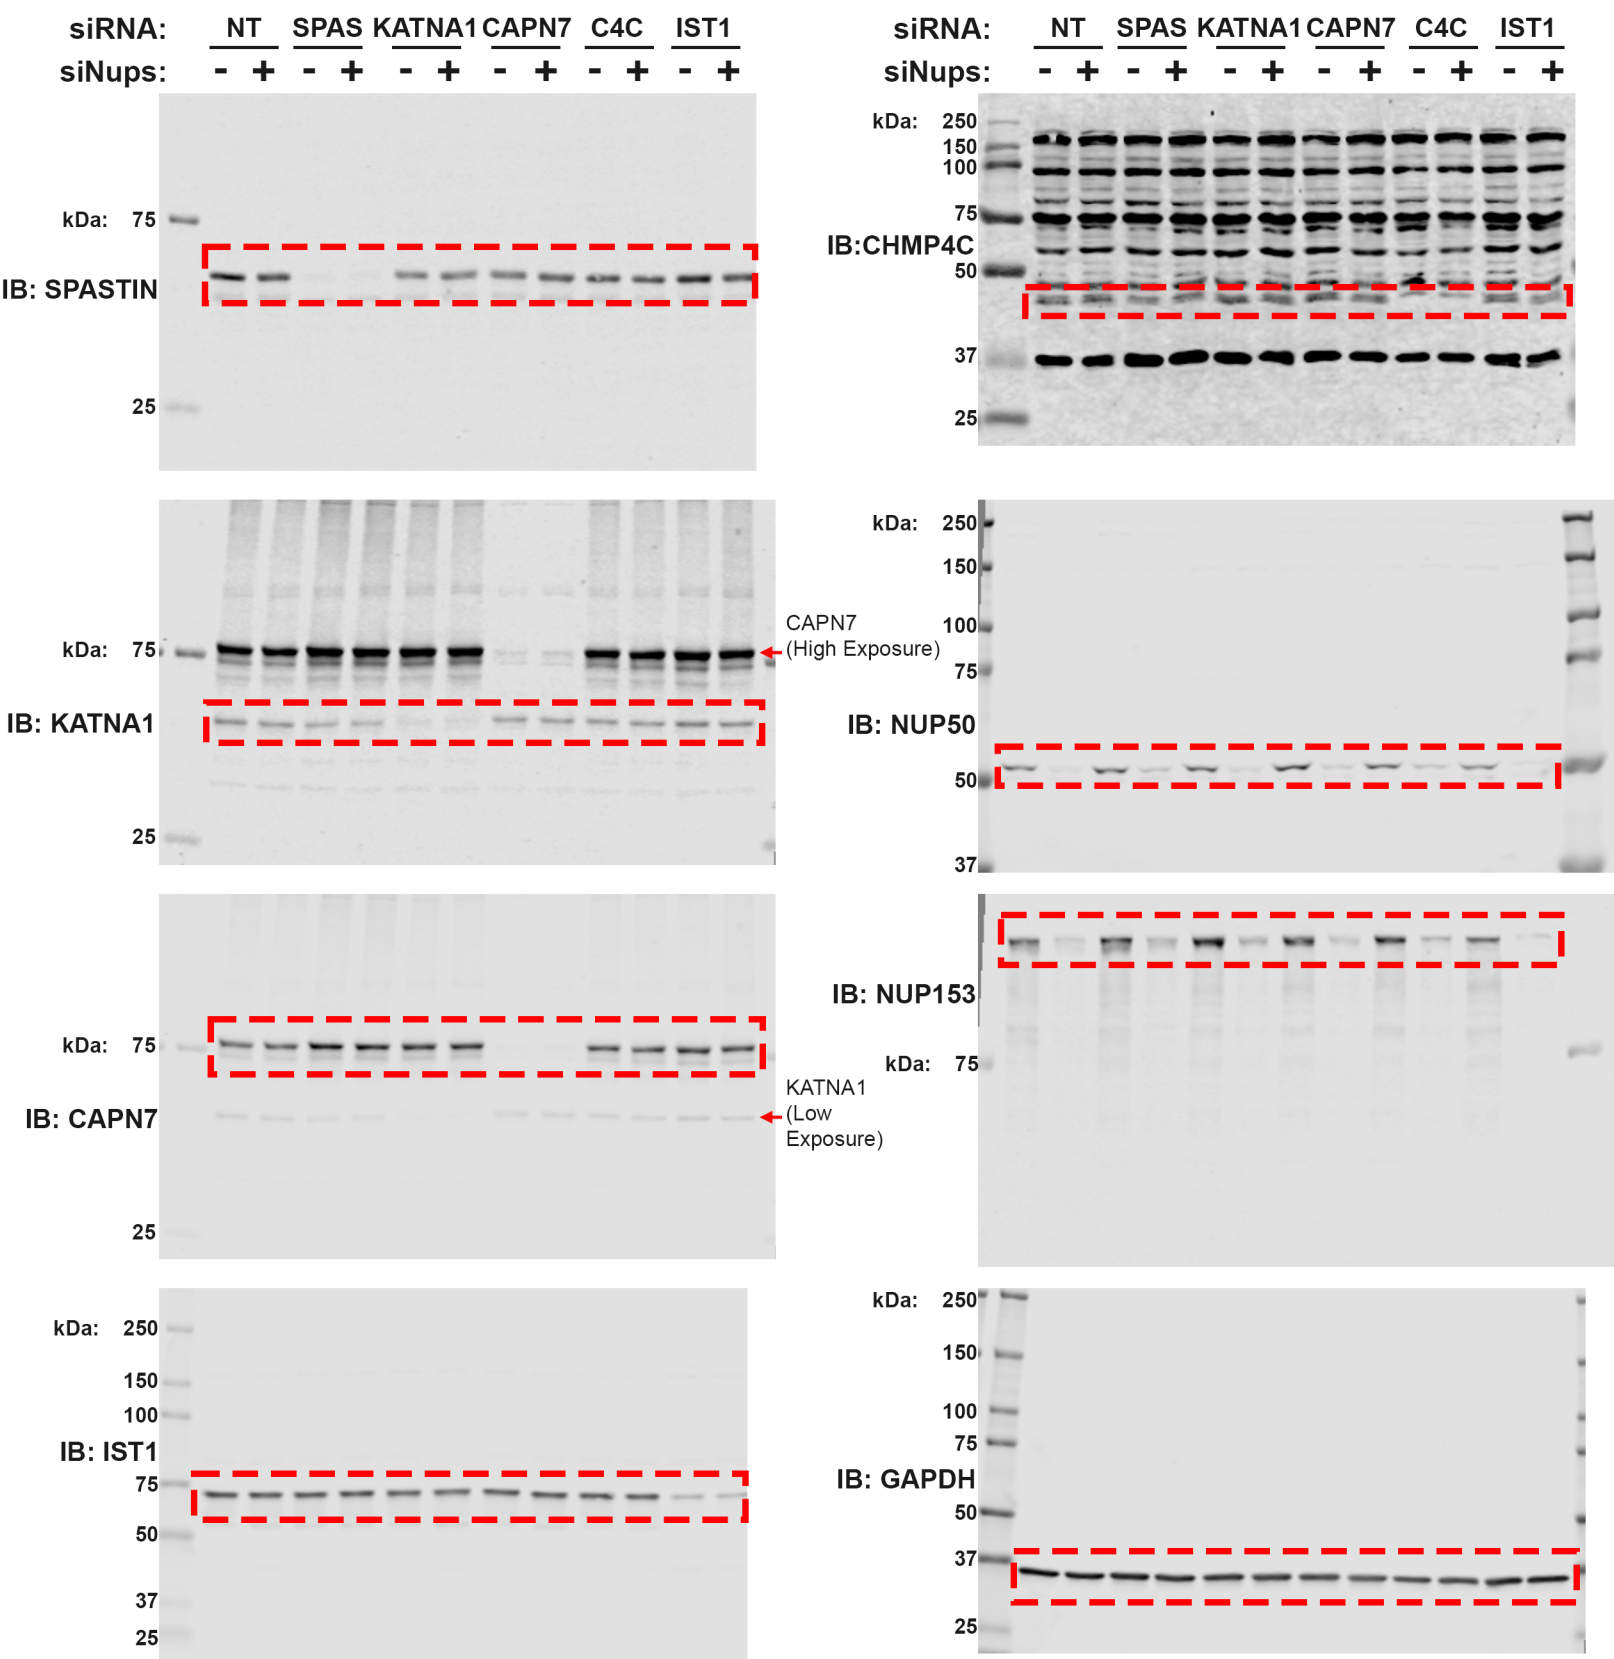

Uncropped Western blots for Figure 5 - figure supplement 1A.

Supplement: fig5-figsupp1-data1 [file elife-77779-fig5-figsupp1-data1-v1.zip]

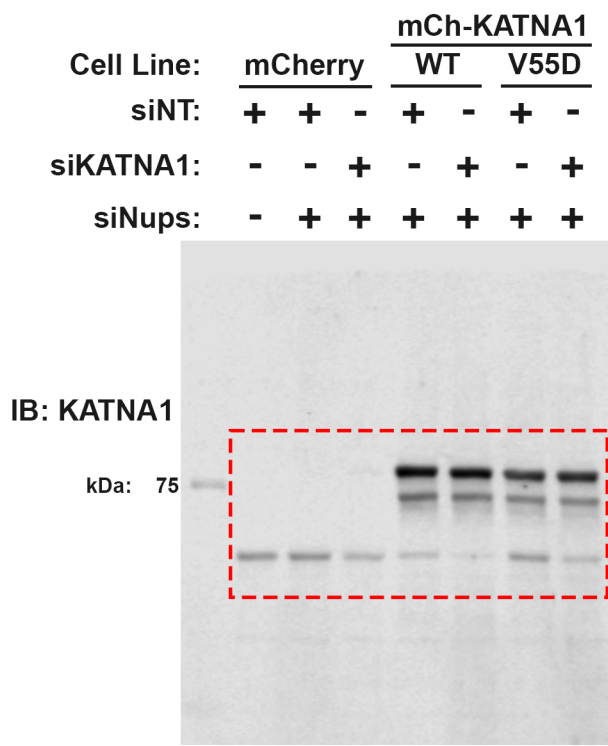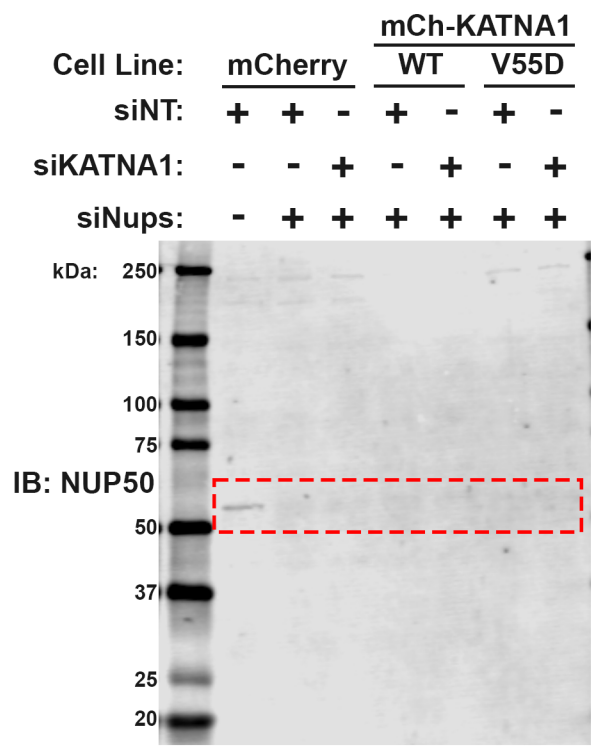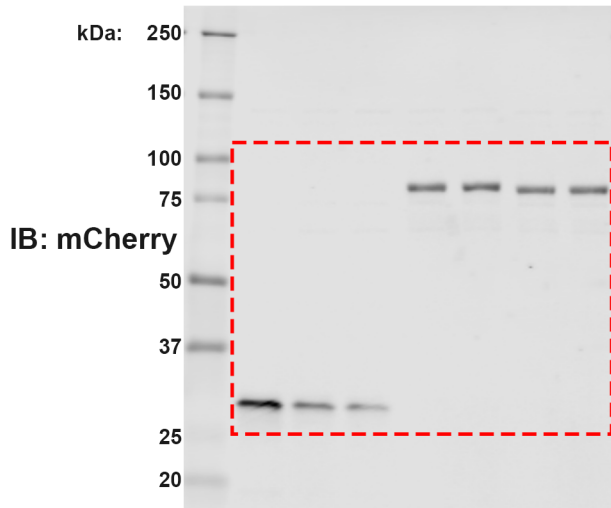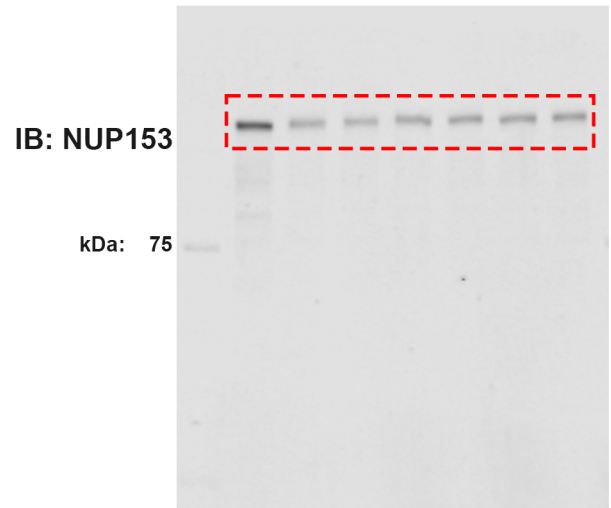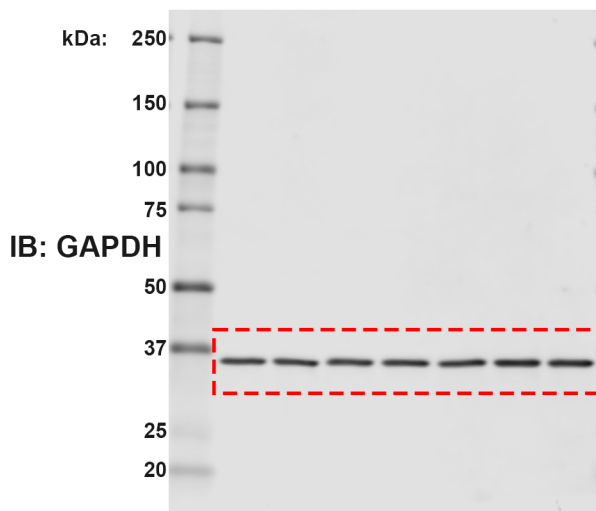

Uncropped Western blots for Figure 6-figure supplement 1B.

Supplement: fig6-figsupp1-data1 [file Figure 6-figure supplement 1B uncropped blots.pdf › Figure 6-figure supplement 1 source data 1/Figure 6-figure supplement 1B uncropped blots.pdf]

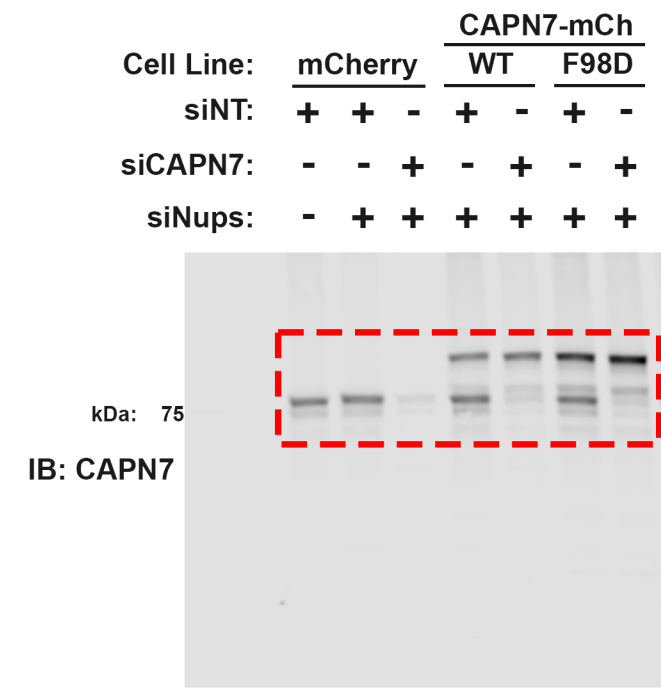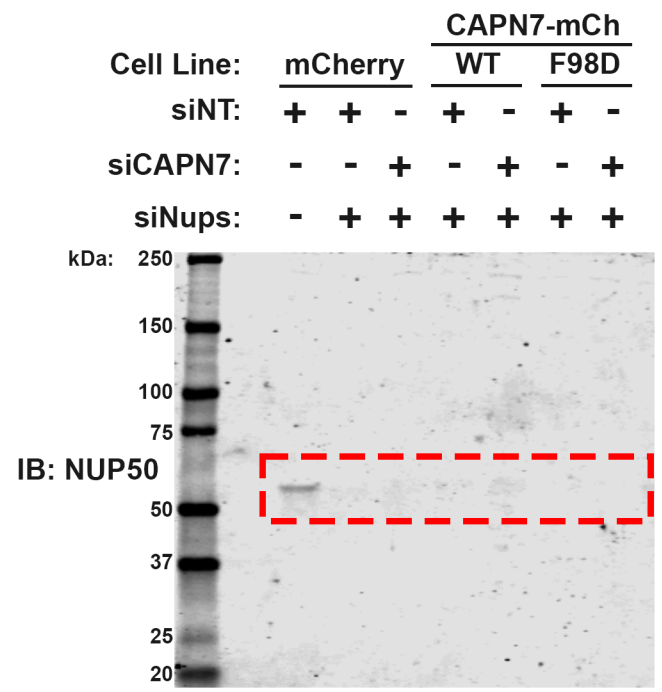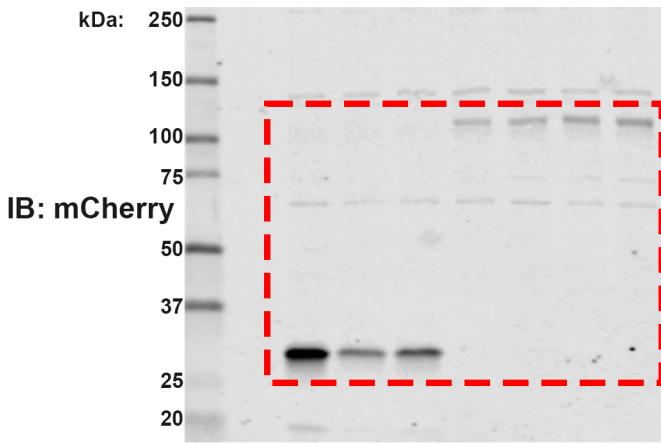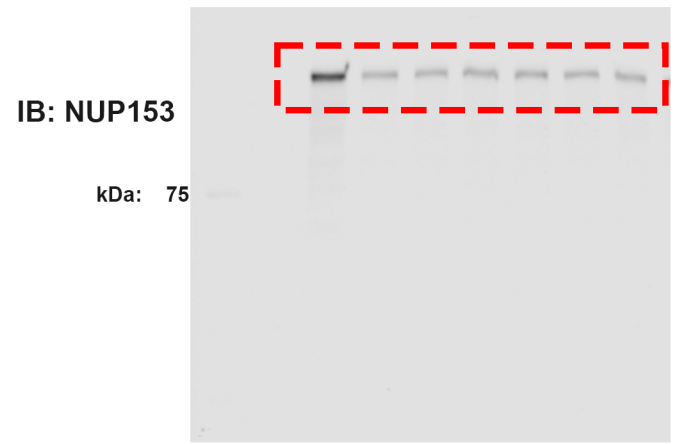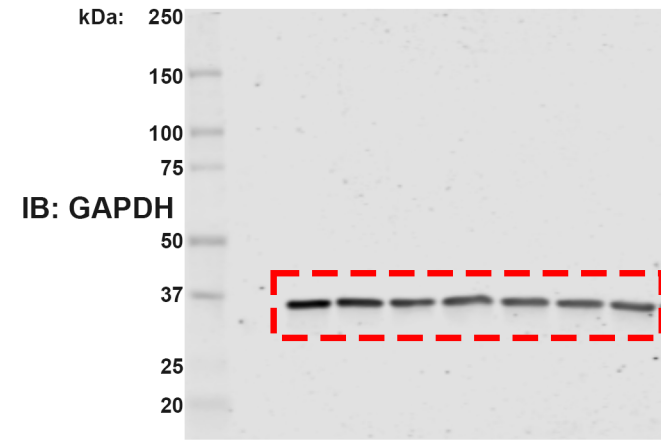

Uncropped Western blots for Figure 6-figure supplement 1C.

Supplement: fig6-figsupp1-data1 [file Figure 6-figure supplement 1C uncropped blots.pdf › Figure 6-figure supplement 1 source data 1/Figure 6-figure supplement 1C uncropped blots.pdf]

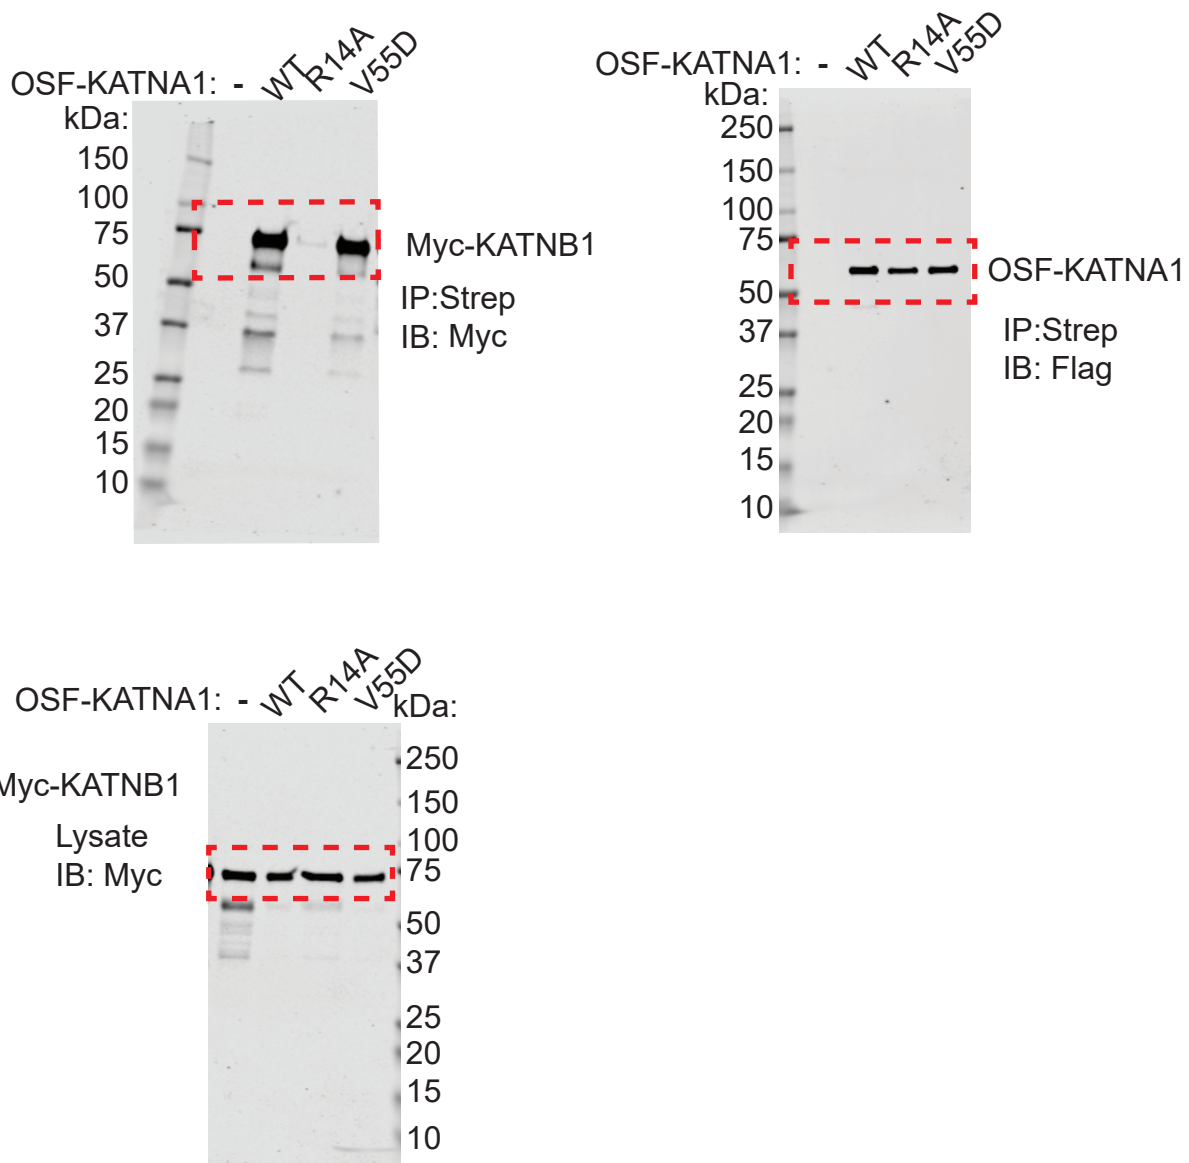

Uncropped Western blots for Figure 6-figure supplement 2B.

Supplement: fig6-figsupp2-data1 [file elife-77779-fig6-figsupp2-data1-v1.zip]
